# Supplementary material
Source: Springer Nature journal article supplement (https://www.springermedizin.de/resource/supplementary/12882_2012_480_MOESM1_ESM.pdf/9454182)

**A**

CsA treated rat

CsA+EPL treated rat

Control rat

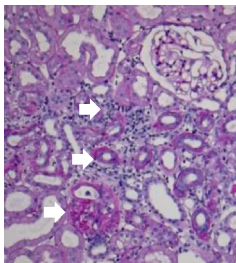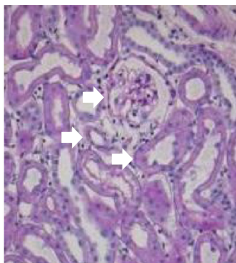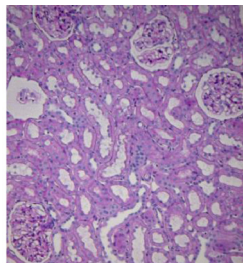**B**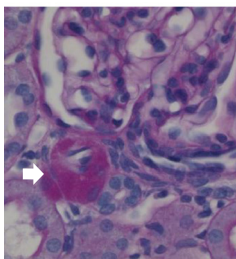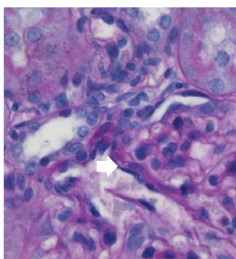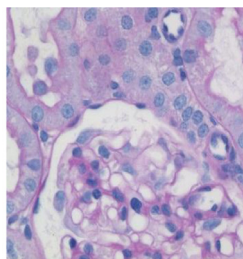**C**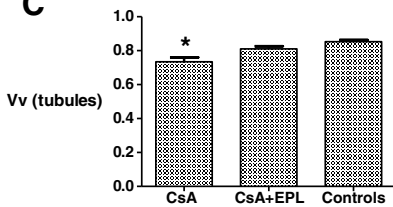**D**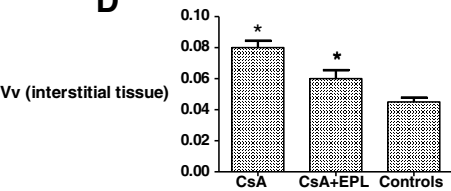

Supplement: MOESM1 [file 9454182]
